# Supplementary material
Source: PubMed Central journal article supplement (PMC3956146)
Supplement: 1324266111_pnas.201324266SI.pdf [file 1324266111_pnas.201324266SI.pdf]

# Supporting Information

Lee et al. 10.1073/pnas.1324266111

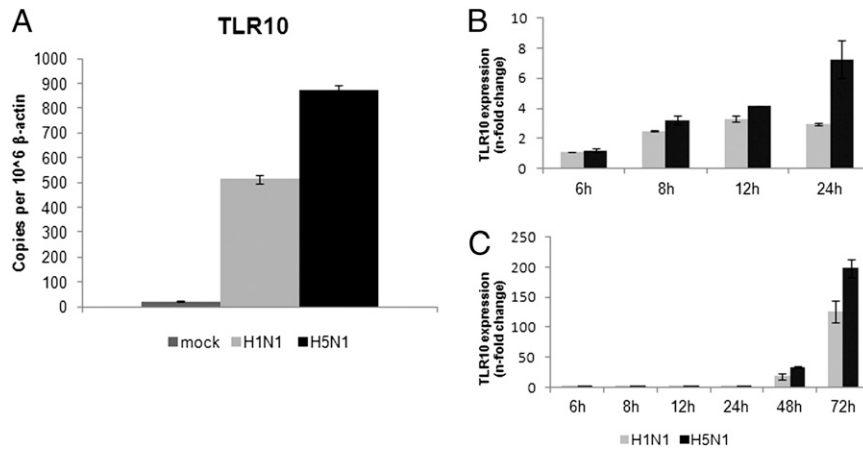

**Fig. S1.** Influenza A virus-induced *TLR10* expression. (A) The absolute number of *TLR10* cDNA copies in primary human macrophages infected by influenza A virus of hemagglutinin (H) and neuraminidase (N) subtypes, H1N1 or H5N1 (MOI of 2), at 6 h after infection determined using RT-PCR. Uninfected (mock) cells were included for comparison. Expression of *TLR10* was normalized to  $\beta$ -actin expression. Data shown are representative of biological replicates performed in at least three independent experiments and error bars indicate SD of technical triplicates. (B) Expression of *TLR10* in alveolar epithelial cells (A549) infected by H1N1 or H5N1 influenza A viruses at (B) MOI of 2 or (C) MOI of 0.001 compared with mock infection at different postinfection time assessed by RT-PCR. Data shown are representative of two independent experiments and error bars indicate SD of technical triplicates.

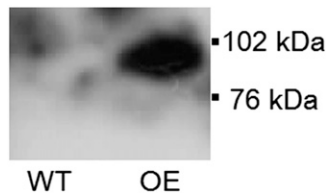

**Fig. S2.** Western blot analysis of TLR10. Confirmation of specificity of TLR10 antibody using WT and TLR10-overexpressed (OE) THP-1 cell lysate.
